# Supplementary material
Source: PubMed Central journal article supplement (PMC3193238)
Supplement: 1112288108_pnas.201112288SI.pdf [file 1112288108_pnas.201112288SI.pdf]

# Supporting Information

Chaudhari et al. 10.1073/pnas.1112288108

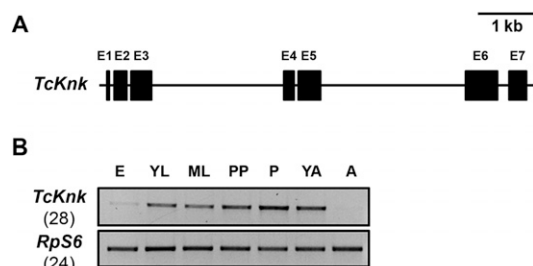

**Fig. 51.** Developmental stage-specific expression pattern of the *Tribolium castaneum* *Knickkopf* (*TcKnk*) was determined by RT-PCR. (A) Schematic diagram of the exon–intron organization of the *TcKnk* gene. The exon–intron organization of the *TcKnk* gene was determined by sequence comparison between genomic sequence and the full-length cDNA sequence containing 5' and 3' UTR regions. This gene is composed of seven exons and encodes a 75-kDa protein that shares 60% amino acid sequence identity with *Drosophila melanogaster* Knk. Black solid boxes indicate exons, and lines indicate introns. (B) Expression of *TcKnk* during insect development. Total RNA was prepared from eggs (E), young larvae (YL), mature last-instar larvae (ML), pharate pupae (PP), pupae (P), young adult (YA), and adult (A) stages. cDNAs synthesized from total RNAs with oligo(dT)<sub>20</sub> primers and reverse transcriptase were used as templates for RT-PCR (28 cycles) using gene-specific primer pairs. *RpS6* was used as an internal loading control (24 cycles).

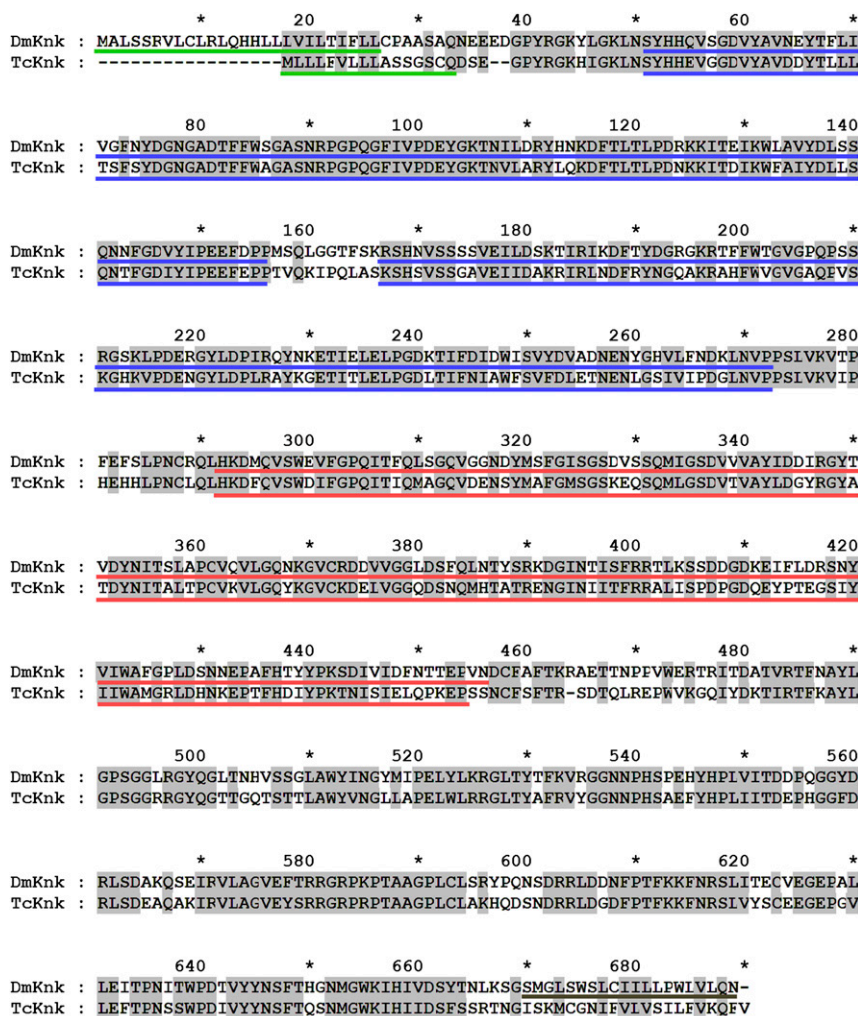

**Fig. 52.** Amino acid sequence alignment of *TcKnk* and *D. melanogaster* Knk (DmKnk). Gray shading of amino acid residues indicates identity. Underlines of different colors indicate different domains: green, leader peptide; blue, DM13 domains; red, dopamine monoxygenase N-terminal like (DOMON) domain; black, GPI anchor-specifying sequence.

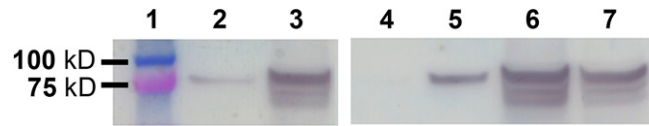

**Fig. S3.** TcKnk is a GPI-anchored, membrane-bound protein. Recombinant TcKnk protein expressed in Hi-5 cells infected with a recombinant baculovirus containing the ORF of TcKnk is shown. After 72 h of infection, the medium was removed, and fresh medium was added along with 100  $\mu$ L of phosphatidylinositol-specific phospholipase C (PI-PLC) from *Bacillus cereus* (7.89 units/mg) for 4 h. The proteins in the medium and cell pellet were subjected to Western blot analysis with an anti-Knk antiserum. Lane 1, size marker; lane 2, medium from TcKnk-expressing Hi-5 cells after 72 h of infection; and lane 3, cell pellet from TcKnk-expressing Hi-5 cells at 72 h after infection. For lanes 4–7, old medium was removed and replaced with fresh medium with or without added PI-PLC. Lane 4, medium from TcKnk-expressing Hi-5 cells after mock treatment for 4 h without PI-PLC; lane 5, medium from TcKnk-expressing Hi-5 cells at 4 h after PI-PLC treatment; lane 6, TcKnk-expressing Hi-5 cell pellet without PI-PLC treatment; and lane 7, cell pellet from TcKnk-expressing Hi-5 cells after 4 h of PI-PLC treatment. TcKnk was found predominantly in the cell pellet fraction (lane 3 versus lane 2), and some of it was released to the medium after 4 h of PI-PLC treatment (compare lane 5 with lanes 4 and 7). The two lower immunoreactive bands probably represent TcKnk protein without GPA anchor and/or unprocessed forms.

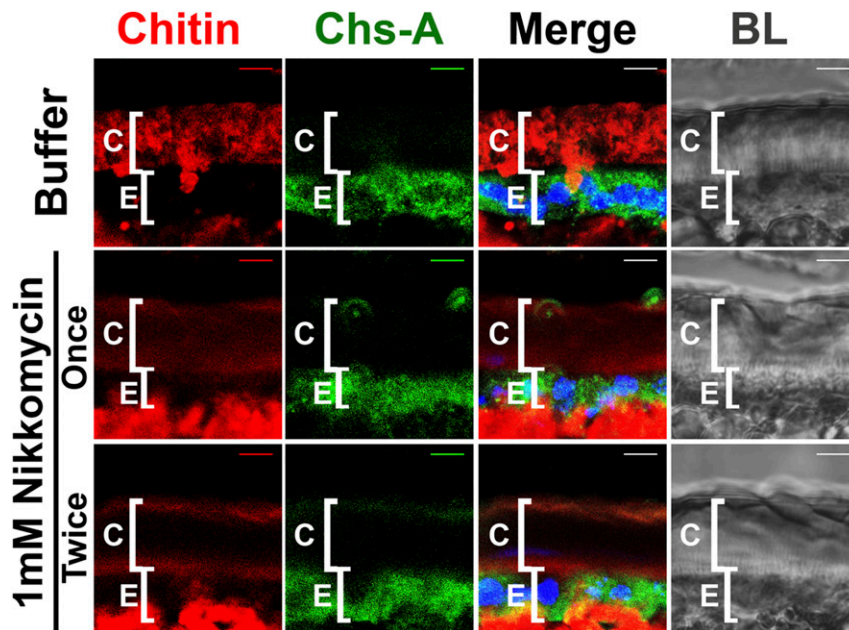

**Fig. S4.** Localization of *T. castaneum* chitin synthase A (TcChs-A) in elytra of pharate adults after nikkomycin treatment. Cellular distribution of TcChs-A (green) in insects injected once or twice with 0.5  $\mu$ L of 1 mM nikkomycin (a chitin synthase inhibitor) was not changed in comparison with buffer-injected insects after analysis by confocal microscopy (as described in Fig. 3). Red, rhodamine-conjugated chitin-binding probe; C, cuticle; E, epithelial cells. (Scale bars: 5  $\mu$ m.) The red staining below the epidermis is nonspecific, whereas the staining above the epidermis is chitin-specific.

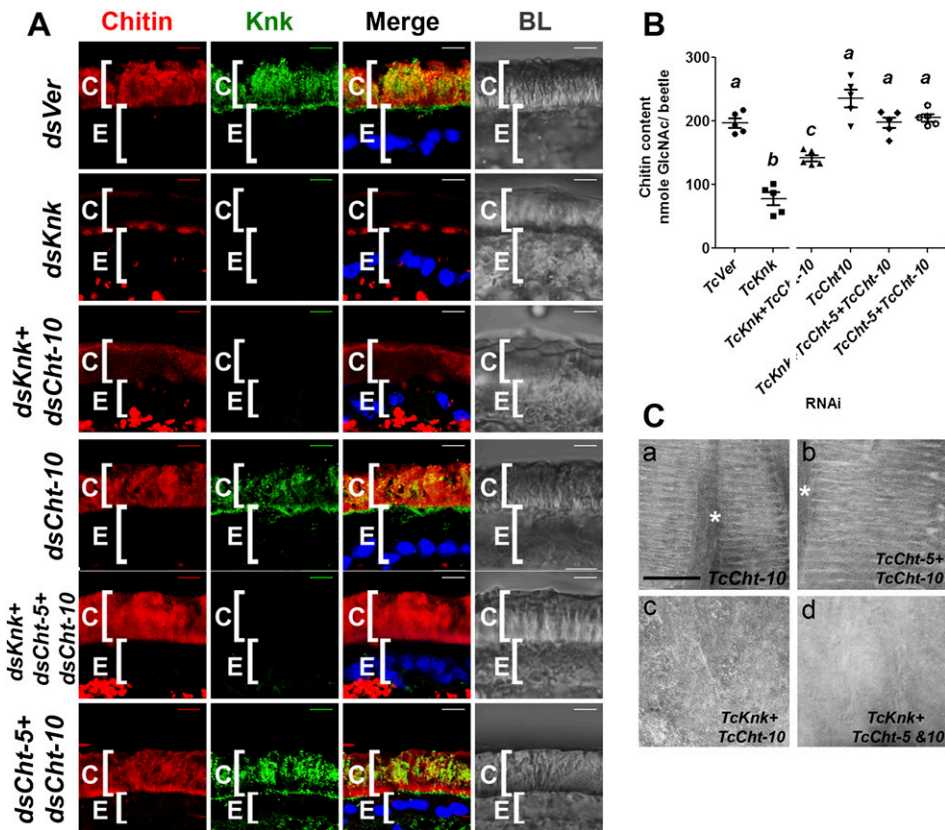

**Fig. 55.** Knk protects procuticular chitin from chitinases. (A) Immunostaining of cryosections of lateral abdominal body wall from control (*dsVer*) pharate adults or after treatment with the indicated combinations of dsRNAs for *TcKnk* (*dsKnk*), *TcCht-10* (*dsCht-10*), and *TcCht-5* (*dsCht-5*). Chitin, red; Knk, green; DAPI, blue; C, cuticle; E, epithelial cells. (Scale bars: 5  $\mu$ m.) (B) Analysis of total chitin content by a modified Morgan-Elson assay. Data are reported as mean  $\pm$  SE ( $n = 5$  each). Statistical significance was computed with Student's *t* test. Means identified by different letters (a, b, and c) are significantly different at  $P < 0.05$ . (C) Ultrastructure of pharate adult elytral cuticle. Cuticle after *TcCht-10* single (a) or *TcCht-5* and *TcCht-10* double (b) dsRNA treatment is normal and indistinguishable from *T. castaneum Vermilion* (*TcVer*) dsRNA-treated samples (Fig. 4C). The elytral cuticle of pharate adults treated with dsRNA for *TcKnk* (c), or *TcCht-5* and *TcCht-10* along with dsRNA for *TcKnk* (d) does not restore the laminar organization of chitin. (Scale bar: 500 nm.)

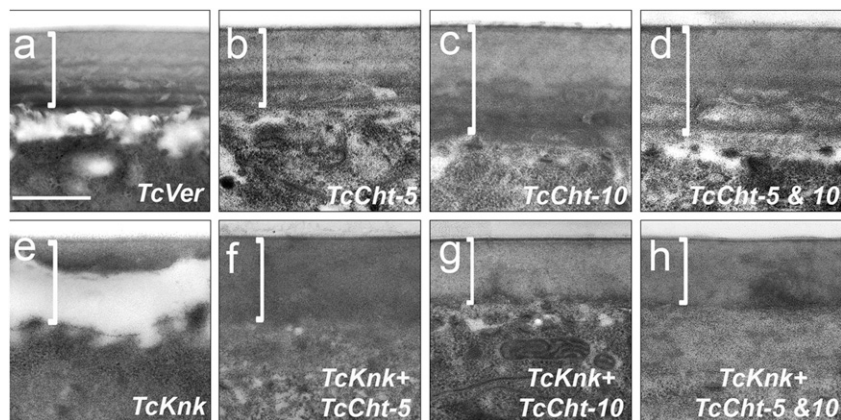

**Fig. 56.** Lamina organization of the ventral body wall cuticle of pharate adults depends on *TcKnk*, *TcCht-5*, and *TcCht-10*. The ventral body wall cuticle (bracket) of control animals (*TcVer*) is arranged in horizontal sheets presumably made up of chitin (A). This laminar organization is not perturbed in the respective cuticles of animals treated with dsRNAs for *TcCht-5* (B), *TcCht-10* (C), or *TcCht-5* and *TcCht-10* (D). By contrast, upon *TcKnk* knockdown in the ventral body wall cuticle, the laminae are absent (E). Simultaneous knockdown of *TcKnk* transcripts along with *TcCht-5* (F), *TcCht-10* (G), or *TcCht-5* and *TcCht-10* (H) does not restore laminar structure even though chitin levels are restored (Fig. 4C and Fig. 55C). (Scale bar: 500 nm.)
